# Supplementary material for: The Neoadjuvant Administration of PD‐1 Inhibitor plus Concurrent Chemoradiotherapy in Patients with Locally Advanced Esophageal Squamous‐Cell Carcinoma
Source: Hindawi journal article supplement (doi:10.1155/2024/5542947), 2024-01-01
Supplement: f1 [file 5542947.f1.zip]

Archive with 2 entries (2 files):
- Supplementary Table 1.docx
- Supplementary Table 2.docx
