# Supplementary material for: The Neoadjuvant Administration of PD‐1 Inhibitor plus Concurrent Chemoradiotherapy in Patients with Locally Advanced Esophageal Squamous‐Cell Carcinoma
Source: Hindawi journal article supplement (doi:10.1155/2024/5542947), 2024-01-01
Supplement: f1 [file 5542947.f1.zip › Supplementary Table 1.docx]

**Supplementary Table 1.** Correlation of any particular combination of treatment with adverse events.

| Events | (1)  (n = 5) | (2)  (n = 2) | (3)  (n = 5) | (4)  (n = 2) | (5)  (n = 2) | (6)  (n = 2) | (7)  (n = 2) | (8)  (n = 1) | (9)  (n = 1) | (10)  (n = 1) | (11)  (n = 2) | *P* value |
| --- | --- | --- | --- | --- | --- | --- | --- | --- | --- | --- | --- | --- |
| Fatigue | 1 (20.0) | 2 (100.0) | 1 (20.0) | 2 (100.0) | 1 (50.0) | 1 (50.0) | 2 (100.0) | 1 (100.0) | 1 (100.0) | 0 (0.0) | 0 (0.0) | 0.126 |
| Nausea and vomiting | 1 (20.0) | 0 (0.0) | 2 (40.0) | 0 (0.0) | 1 (50.0) | 1 (500.) | 2 (100.0) | 1 (100.0) | 1 (100.0) | 0 (0.0) | 1 (50.0) | 0.601 |
| Leukopenia | 0 (0.0) | 0 (0.0) | 4 (80.0) | 0 (0.0) | 1 (50.0) | 0 (0.0) | 2 (100.0) | 1 (100.0) | 0 (0.0) | 0 (0.0) | 1 (50.0) | 0.030 |
| Neutropenia | 2 (40.0) | 0 (0.0) | 2 (40.0) | 0 (0.0) | 1 (50.0) | 1 (50.0) | 1 (50.0) | 1 (100.0) | 1 (100.0) | 0 (0.0) | 0 (0.0) | 0.889 |
| Peripheral neuropathy | 2 (40.0) | 2 (100.0) | 1 (20.0) | 1 (50.0) | 0 (0.0) | 1 (50.0) | 1 (50.0) | 0 (0.0) | 0 (0.0) | 0 (0.0) | 1 (50.0) | 0.889 |
| Anemia | 1 (25.0) | 0 (0.0) | 2 (40.0) | 0 (0.0) | 1 (50.0) | 1 (50.0) | 0 (0.0) | 0 (0.0) | 1 (100.0) | 1 (100.0) | 1 (50.0) | 0.810 |
| Pruritus | 1 (20.0) | 1 (50.0) | 2 (40.0) | 0 (0.0) | 1 (50.0) | 0 (0.0) | 1 (50.0) | 1 (100.0) | 0 (0.0) | 0 (0.0) | 1 (50.0) | 0.959 |
| Hand-foot syndrome | 0 (0.0) | 2 (100.0) | 1 (20.0) | 1 (50.0) | 0 (0.0) | 1 (50.0) | 1 (50.0) | 0 (0.0) | 0 (0.0) | 0 (0.0) | 2 (100.0) | 0.106 |
| Elevated transaminase | 2 (40.0) | 0 (0.0) | 1 (20.0) | 1 (50.0) | 1 (50.0) | 1 (50.0) | 0 (0.0) | 0 (0.0) | 0 (0.0) | 0 (0.0) | 1 (50.0) | 1.000 |
| Diarrhea | 1 (20.0) | 0 (0.0) | 1 (20.0) | 0 (0.0) | 1 (50.0) | 2 (100.0) | 0 (0.0) | 0 (0.0) | 0 (0.0) | 0 (0.0) | 0 (0.0) | 0.499 |
| Thrombocytopenia | 1 (20.0) | 0 (0.0) | 0 (0.0) | 0 (0.0) | 0 (0.0) | 0 (0.0) | 0 (0.0) | 0 (0.0) | 1 (100.0) | 0 (0.0) | 2 (100.0) | 0.067 |
| Fever | 0 (0.0) | 0 (0.0) | 1 (20.0) | 0 (0.0) | 0 (0.0) | 1 (50.0) | 2 (100.0) | 0 (0.0) | 0 (0.0) | 0 (0.0) | 0 (0.0) | 0.200 |
| Anorexia | 1 (20.0) | 0 (0.0) | 1 (20.0) | 0 (0.0) | 0 (0.0) | 0 (0.0) | 1 (50.0) | 0 (0.0) | 0 (0.0) | 0 (0.0) | 1 (50.0) | 1.000 |
| Hypertension | 1 (20.0) | 0 (0.0) | 1 (20.0) | 0 (0.0) | 1 (50.0) | 0 (0.0) | 1 (50.0) | 0 (0.0) | 0 (0.0) | 0 (0.0) | 0 (0.0) | 1.000 |
| Elevated bilirubin | 0 (0.0) | 0 (0.0) | 0 (0.0) | 1 (50.0) | 0 (0.0) | 1 (50.0) | 0 (0.0) | 0 (0.0) | 0 (0.0) | 0 (0.0) | 1 (50.0) | 0.237 |

(1) camrelizumab plus paclitaxel+cisplatin plus 40Gy/20F; (2) camrelizumab plus paclitaxel+ carboplatin plus 40Gy/20F; (3) camrelizumab plus paclitaxel+ carboplatin plus 41.4Gy/23F; (4) Sintilimab plus paclitaxel+cisplatin plus 40Gy/20F; (5) Sintilimab plus paclitaxel+cisplatin plus 41.4Gy/23F; (6) Sintilimab plus paclitaxel+ carboplatin plus 40Gy/20F; (7) Sintilimab plus paclitaxel+ carboplatin plus 41.4Gy/23F; (8) Other plus paclitaxel+cisplatin plus 40Gy/20F; (9) Other plus paclitaxel+cisplatin plus 41.4Gy/23F; (10) Other plus paclitaxel+ carboplatin plus 40Gy/20F; (11) Other plus paclitaxel+ carboplatin plus 41.4Gy/23F. 40 Gy/20 F, 40.0 Gy in 20 fractions; 41.4 Gy/23 F, 41.4 Gy in 23 fractions.
