# Supplementary material for: The Neoadjuvant Administration of PD‐1 Inhibitor plus Concurrent Chemoradiotherapy in Patients with Locally Advanced Esophageal Squamous‐Cell Carcinoma
Source: Hindawi journal article supplement (doi:10.1155/2024/5542947), 2024-01-01
Supplement: f1 [file 5542947.f1.zip › Supplementary Table 2.docx]

**Supplementary Table 2.** Correlation of age and gender with adverse events.

| Events | Age | | |  | Gender | | |
| --- | --- | --- | --- | --- | --- | --- | --- |
| ≤60 years (n = 14) | >60 years (n = 11) | *P* value |  | Female (n = 7) | Male (n = 18) | *P* value |
| Fatigue | 8 (57.1) | 4 (36.4) | 0.428 |  | 3 (42.9) | 9 (50.0) | 0.550 |
| Nausea and vomiting | 7 (50.0) | 3 (27.3) | 0.414 |  | 1 (14.3) | 9 (50.0) | 0.179 |
| Leukopenia | 5 (35.7) | 4 (36.4) | 1.000 |  | 3 (42.9) | 6 (33.3) | 0.673 |
| Neutropenia | 4 (28.6) | 5 (45.5) | 0.434 |  | 3 (42.9) | 6 (33.3) | 0.673 |
| Peripheral neuropathy | 5 (35.7) | 4 (36.4) | 1.000 |  | 2 (28.6) | 7 (38.9) | 1.000 |
| Anemia | 4 (30.8) | 4 (36.4) | 1.000 |  | 2 (28.6) | 6 (35.3) | 1.000 |
| Pruritus | 5 (35.7) | 3 (27.3) | 0.695 |  | 3 (42.9) | 5 (27.8) | 0.640 |
| Hand-foot syndrome | 6 (42.9) | 2 (18.2) | 0.234 |  | 1 (14.3) | 7 (38.9) | 0.362 |
| Elevated transaminase | 3 (21.4) | 4 (36.4) | 0.656 |  | 1 (14.3) | 6 (33.3) | 0.626 |
| Diarrhea | 2 (14.3) | 3 (27.3) | 0.623 |  | 2 (28.6) | 3 (16.7) | 0.597 |
| Thrombocytopenia | 2 (14.3) | 2 (18.2) | 1.000 |  | 1 (14.3) | 3 (16.7) | 1.000 |
| Fever | 3 (21.4) | 1 (9.1) | 0.604 |  | 0 (0.0) | 4 (22.2) | 0.294 |
| Anorexia | 2 (14.3) | 2 (18.2) | 1.000 |  | 1 (14.3) | 3 (16.7) | 1.000 |
| Hypertension | 3 (21.4) | 1 (9.1) | 0.604 |  | 0 (0.0) | 4 (22.2) | 0.294 |
| Elevated bilirubin | 3 (21.4) | 0 (0.0) | 0.230 |  | 0 (0.0) | 3 (16.7) | 0.355 |
